# Supplementary material
Source: PubMed Central journal article supplement (PMC3952169)
Supplement: NIHMS558424-supplement-1.pdf [file NIHMS558424-supplement-1.pdf]

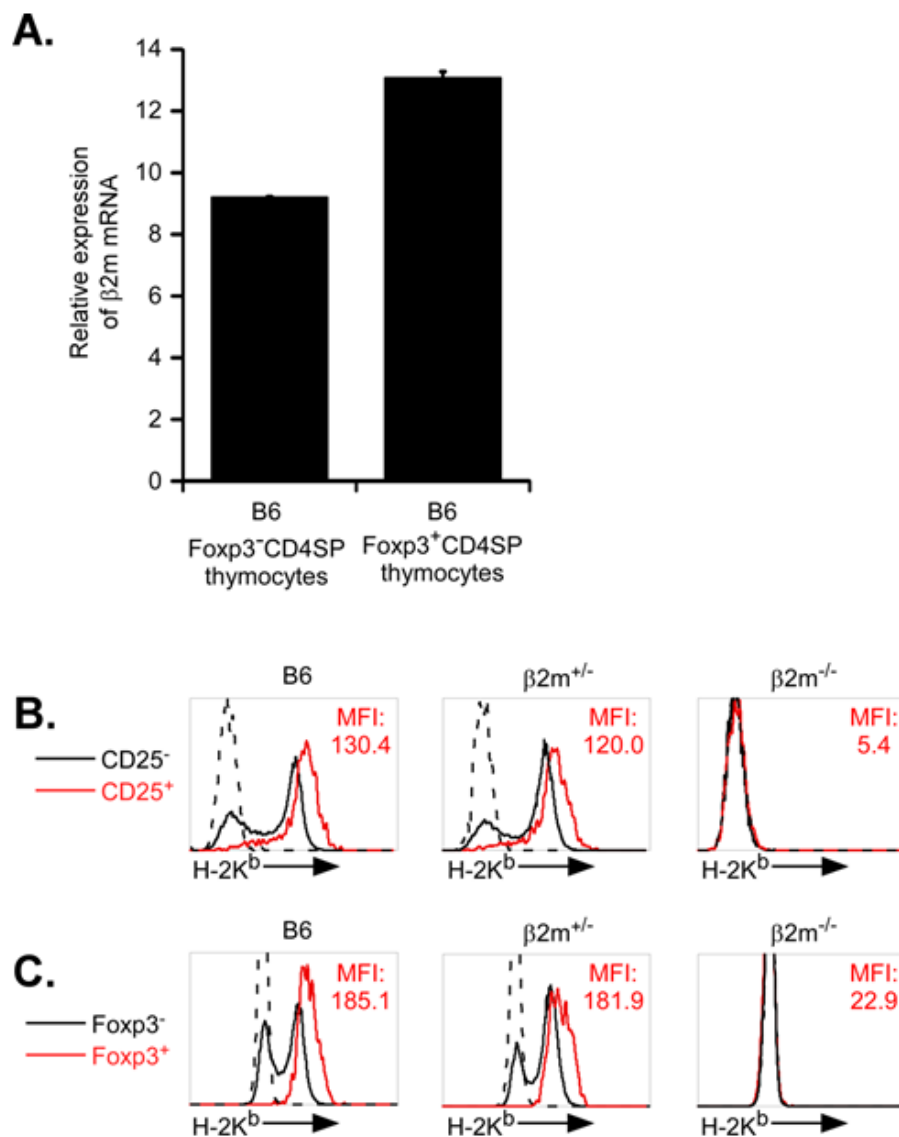

**Supplementary Figure 1. MHC class I and beta-2-microglobulin expression in Tregs.**

- Beta-2-microglobulin ( $\beta 2m$ ) RNA levels are elevated in  $\text{Foxp3}^+ \text{CD4SP}$  thymocytes relative to  $\text{Foxp3}^- \text{CD4SP}$  thymocytes. Total RNA was isolated from purified Tregs and Tconv and subjected to RT-PCR.
- Surface expression of MHC class I is equivalent on Tregs derived from WT and  $\beta 2m^{+/-}$  mice. Thymocytes were surface stained for H-2K<sup>b</sup>, CD4, CD8 and CD25, as described in Materials and Methods. FACS profiles of class I expression on the  $\text{CD4}^+ \text{CD25}^+$  (red line) and  $\text{CD4}^+ \text{CD25}^-$  (black) populations are shown. Data are representative of two independent experiments.
- Surface expression of MHC class I is equivalent on Tregs derived from WT and  $\beta 2m^{+/-}$  mice. Thymocytes were surface stained for H-2K<sup>b</sup>, CD4, CD8, fixed and stained for intracellular Foxp3, as described in Materials and Methods. FACS profiles of class I expression on the  $\text{CD4}^+ \text{Foxp3}^+$  (red line) and  $\text{CD4}^+ \text{Foxp3}^-$  (black) populations are shown. Data are representative of two independent experiments.

Foxp3/IRE

|       |                                                                      |     |
|-------|----------------------------------------------------------------------|-----|
| H-2Kb | GGGGTGGGAAGCCCAGGGCTGGGGATTCCCCATCTCCAC <u>AGTTTCACTTCT</u> GCACCT—  | 482 |
| PD1   | TGGGCGGGGAGGCGCGGTGGTGGGGAGTCCCCGTGTCCC <u>AGTTTCACTTCT</u> CCGTCTCG | 528 |
|       | *** ***** .** *.* * ***** ***** .* *** .***** ***** * . **           |     |
| H-2Kb | —AACCTGGGTCAGGTCCTTCTGTCCGGACACTGTTGACGCGCAGTCAGCTCTTACCCCA          | 541 |
| PD1   | CAACCTGTGTGGGACCGTCCTGCCCGGACACTCGTGACGCGACCCCACTTCTCTCTCCTA         | 588 |
|       | ***** ** .*. * * ** ***** ***** .** .***. *.*.*                      |     |
| H-2Kb | TTGGGTGGCGGATCACCAAGAA— <u>CCAAT</u> CAGTGTGCGCGGACGCTGGATATAAAGTC   | 600 |
| PD1   | TTGCGTGTCCGTTTCTGGAGAAG <u>CCAAT</u> CGGCGCCACTGCGGTTCCCGTTCTAAACTC  | 648 |
|       | *** ** * *:* . . ***** ***** .*.*.*.*****: . *.* * ** ** *           |     |
| H-2Kb | CACGC—AGCCCGCAGAACT <u>CA</u> GAAGTCGCGAATCG—CCGACAGG—TGCGATGGTACC   | 654 |
| PD1   | TCCACCCACCCGGCTCTGCT <u>CA</u> GCTTCTCCCAGACTCCGAGGCTGAGGATCATGGGGCC | 708 |
|       | .*. * * ** **: :.*****.: * .* . **** . **** .**                      |     |

**Supplementary Figure 2. The MHC class I promoter elements are highly conserved among species.** Alignment of the conserved MHC class I promoter regions in the mouse H-2Kb and swine PD1 genes: red letters, consensus Foxp3 binding site (underlined) and overlapping IRE sequence. (\*), conserved nucleotides. The major transcription start sites are boxed.

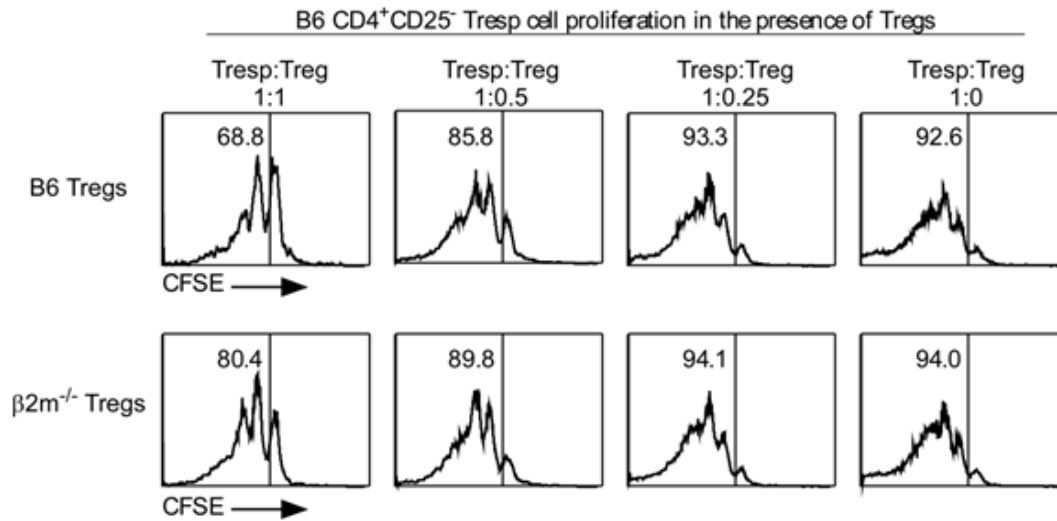

**Supplementary Figure 3. Class I deficiency reduces Treg function *in vitro*.**

Treg suppression as assessed by CFSE dye dilution. CFSE-labeled lymph node CD4<sup>+</sup>CD25<sup>-</sup> Tconv cells from normal B6 mice were either cultured alone or with different numbers of purified CD4<sup>+</sup>CD25<sup>+</sup> Tregs derived from either B6 or  $\beta 2m^{-/-}$  mice and stimulated with anti-CD3 (1  $\mu\text{g}/\text{mL}$ ) and APCs. The CFSE profiles and percentage of Tconv cells that divide at least once in the cocultures are shown. Data are representative of two independent experiments.
